# Supplementary material
Source: PubMed Central journal article supplement (PMC4483114)
Supplement: supp_nou283_nou283supp_fig1.pdf [file supp_nou283_nou283supp_fig1.pdf]

| Country                                                                 | Tumour Main and Subcategory | Incidence Rate                                    | 95% CI               |
|-------------------------------------------------------------------------|-----------------------------|---------------------------------------------------|----------------------|
| <b>All brain tumors; All</b>                                            |                             |                                                   |                      |
| Al Sheyyab, 2003                                                        | Jordan                      | All brain tumors; All                             | 1.88 [ 1.56; 2.27]   |
| Ligant, 2000                                                            | Estonia                     | All brain tumors; All                             | 9.00 [ 8.56; 9.46]   |
| Makino, 2010                                                            | Japan                       | All brain tumors; All                             | 3.61 [ 3.15; 4.13]   |
| D'Alessandro, 1995                                                      | Italy                       | All brain tumors; All                             | 25.95 [25.04; 26.90] |
| Davis, 2001                                                             | USA                         | All brain tumors; All                             | 13.80 [13.50; 14.10] |
| Dobec-Meic, 2006                                                        | Croatia                     | All brain tumors; All                             | 12.10 [10.31; 14.21] |
| Kuratsu, 2001                                                           | Japan                       | All brain tumors; All                             | 10.97 [ 9.59; 12.55] |
| Pobereskin, 2000                                                        | England                     | All brain tumors; All                             | 21.04 [17.23; 25.69] |
| Porter, 2010                                                            | USA                         | All brain tumors; All                             | 18.10 [17.80; 18.40] |
| Wohrer, 2009                                                            | Austria                     | All brain tumors; All                             | 18.10 [17.37; 18.86] |
| Pooled Totals                                                           |                             | 10.82 [ 8.63; 13.56]                              |                      |
| <i>Heterogeneity: I-squared=99.7%, Q=2624.9, df=9, p&lt;0.0001</i>      |                             |                                                   |                      |
| <b>All brain tumors; Malignant</b>                                      |                             |                                                   |                      |
| Davis, 2001                                                             | USA                         | All brain tumors; Malignant                       | 7.20 [ 6.96; 7.45]   |
| Porter, 2010                                                            | USA                         | All brain tumors; Malignant                       | 7.20 [ 7.05; 7.35]   |
| Wohrer, 2009                                                            | Austria                     | All brain tumors; Malignant                       | 8.80 [ 8.31; 9.32]   |
| Pooled Totals                                                           |                             | 7.67 [ 6.98; 8.42]                                |                      |
| <i>Heterogeneity: I-squared=95.4%, Q=43.6, df=2, p&lt;0.0001</i>        |                             |                                                   |                      |
| <b>All brain tumors; Nonepithelial</b>                                  |                             |                                                   |                      |
| Dobec-Meic, 2006                                                        | Croatia                     | All brain tumors; Nonepithelial                   | 5.50 [ 4.34; 6.97]   |
| Pooled Totals                                                           |                             | 5.50 [ 4.34; 6.97]                                |                      |
| <i>Heterogeneity: I-squared=Na%<sup>s</sup>, Q=0, df=0, p=1</i>         |                             |                                                   |                      |
| <b>All brain tumors; Nonmalignant</b>                                   |                             |                                                   |                      |
| Davis, 2001                                                             | USA                         | All brain tumors; Nonmalignant                    | 5.80 [ 5.60; 6.00]   |
| Porter, 2010                                                            | USA                         | All brain tumors; Nonmalignant                    | 10.90 [10.70; 11.10] |
| Wohrer, 2009                                                            | Austria                     | All brain tumors; Nonmalignant                    | 7.40 [ 6.97; 7.86]   |
| Pooled Totals                                                           |                             | 7.76 [ 4.94; 12.20]                               |                      |
| <i>Heterogeneity: I-squared=99.8%, Q=1061.9, df=2, p&lt;0.0001</i>      |                             |                                                   |                      |
| <b>All brain tumors; NOS</b>                                            |                             |                                                   |                      |
| Ligant, 2000                                                            | Estonia                     | All brain tumors; NOS                             | 1.75 [ 1.56; 1.96]   |
| Wohrer, 2009                                                            | Austria                     | All brain tumors; NOS                             | 1.78 [ 1.56; 2.03]   |
| Pooled Totals                                                           |                             | 1.76 [ 1.62; 1.92]                                |                      |
| <i>Heterogeneity: I-squared=0%, Q=0, df=1, p=0.8463</i>                 |                             |                                                   |                      |
| <b>All brain tumors; Pediatric – malignant</b>                          |                             |                                                   |                      |
| Davis, 2001                                                             | USA                         | All brain tumors; Pediatric – malignant           | 3.40 [ 3.11; 3.71]   |
| Pooled Totals                                                           |                             | 3.40 [ 3.11; 3.71]                                |                      |
| <i>Heterogeneity: I-squared=Na%<sup>s</sup>, Q=0, df=0, p=1</i>         |                             |                                                   |                      |
| <b>All brain tumors; Pediatric – NOS</b>                                |                             |                                                   |                      |
| Davis, 2001                                                             | USA                         | All brain tumors; Pediatric – NOS                 | 4.30 [ 3.97; 4.66]   |
| Pooled Totals                                                           |                             | 4.30 [ 3.97; 4.66]                                |                      |
| <i>Heterogeneity: I-squared=Na%<sup>s</sup>, Q=0, df=0, p=1</i>         |                             |                                                   |                      |
| <b>All brain tumors; Uncertain if malignant</b>                         |                             |                                                   |                      |
| Wohrer, 2009                                                            | Austria                     | All brain tumors; Uncertain if malignant          | 2.00 [ 1.76; 2.28]   |
| Pooled Totals                                                           |                             | 2.00 [ 1.76; 2.28]                                |                      |
| <i>Heterogeneity: I-squared=Na%<sup>s</sup>, Q=0, df=0, p=1</i>         |                             |                                                   |                      |
| <b>Choroid plexus tumors; All</b>                                       |                             |                                                   |                      |
| Lacour, 2010                                                            | France                      | Choroid plexus tumors; All                        | 0.10 [ 0.08; 0.13]   |
| Wohrer, 2009                                                            | Austria                     | Choroid plexus tumors; All                        | 0.05 [ 0.02; 0.12]   |
| Lee, 2010                                                               | Korea                       | Choroid plexus tumors; All                        | 0.03 [ 0.02; 0.05]   |
| Pooled Totals                                                           |                             | 0.06 [ 0.02; 0.13]                                |                      |
| <i>Heterogeneity: I-squared=88.4%, Q=17.3, df=2, p=0.0002</i>           |                             |                                                   |                      |
| <b>CNS lymphoma; All</b>                                                |                             |                                                   |                      |
| Dobec-Meic, 2006                                                        | Croatia                     | CNS lymphoma; All                                 | 0.30 [ 0.09; 0.95]   |
| Kuratsu, 2001                                                           | Japan                       | CNS lymphoma; All                                 | 0.29 [ 0.09; 0.94]   |
| Wohrer, 2009                                                            | Austria                     | CNS lymphoma; All                                 | 0.48 [ 0.37; 0.62]   |
| Elia-Pasquet, 2004                                                      | France                      | CNS lymphoma; All                                 | 1.70 [ 1.07; 2.70]   |
| Pooled Totals                                                           |                             | 0.57 [ 0.24; 1.35]                                |                      |
| <i>Heterogeneity: I-squared=88.1%, Q=25.2, df=3, p&lt;0.0001</i>        |                             |                                                   |                      |
| <b>Germ cell tumors; All</b>                                            |                             |                                                   |                      |
| Kuratsu, 2001                                                           | Japan                       | Germ cell tumors; All                             | 0.20 [ 0.15; 0.27]   |
| Makino, 2010                                                            | Japan                       | Germ cell tumors; All                             | 0.50 [ 0.33; 0.76]   |
| Wohrer, 2009                                                            | Austria                     | Germ cell tumors; All                             | 0.09 [ 0.04; 0.19]   |
| Pooled Totals                                                           |                             | 0.22 [ 0.09; 0.50]                                |                      |
| <i>Heterogeneity: I-squared=90.1%, Q=20.1, df=2, p&lt;0.0001</i>        |                             |                                                   |                      |
| <b>Gliomas; All</b>                                                     |                             |                                                   |                      |
| Al Sheyyab, 2003                                                        | Jordan                      | Gliomas; All                                      | 0.18 [ 0.10; 0.33]   |
| Ligant, 2000                                                            | Estonia                     | Gliomas; All                                      | 3.81 [ 3.53; 4.11]   |
| Porter, 2010                                                            | USA                         | Gliomas; All                                      | 6.00 [ 5.85; 6.15]   |
| Elia-Pasquet, 2004                                                      | France                      | Gliomas; All                                      | 14.07 [11.98; 16.52] |
| Pooled Totals                                                           |                             | 3.38 [ 2.04; 5.60]                                |                      |
| <i>Heterogeneity: I-squared=99.2%, Q=239.6, df=3, p&lt;0.0001</i>       |                             |                                                   |                      |
| <b>Gliomas; Ependymoma</b>                                              |                             |                                                   |                      |
| Al Sheyyab, 2003                                                        | Jordan                      | Gliomas; Ependymoma                               | 0.12 [ 0.06; 0.25]   |
| Ligant, 2000                                                            | Estonia                     | Gliomas; Ependymoma                               | 0.15 [ 0.10; 0.22]   |
| Makino, 2010                                                            | Japan                       | Gliomas; Ependymoma                               | 0.15 [ 0.08; 0.28]   |
| Dobec-Meic, 2006                                                        | Croatia                     | Gliomas; Ependymoma                               | 0.30 [ 0.09; 0.95]   |
| Wohrer, 2009                                                            | Austria                     | Gliomas; Ependymoma                               | 0.57 [ 0.44; 0.73]   |
| Pooled Totals                                                           |                             | 0.22 [ 0.10; 0.47]                                |                      |
| <i>Heterogeneity: I-squared=91.3%, Q=46.2, df=4, p&lt;0.0001</i>        |                             |                                                   |                      |
| <b>Gliomas; Grade I – Pilocytic astrocytoma</b>                         |                             |                                                   |                      |
| Wohrer, 2009                                                            | Austria                     | Gliomas; Grade I – Pilocytic astrocytoma          | 0.57 [ 0.43; 0.75]   |
| Elia-Pasquet, 2004                                                      | France                      | Gliomas; Grade I – Pilocytic astrocytoma          | 0.38 [ 0.14; 1.01]   |
| Pooled Totals                                                           |                             | 0.55 [ 0.42; 0.72]                                |                      |
| <i>Heterogeneity: I-squared=0%, Q=0.6, df=1, p=0.4286</i>               |                             |                                                   |                      |
| <b>Gliomas; Grade II – Ependymoma</b>                                   |                             |                                                   |                      |
| Wohrer, 2009                                                            | Austria                     | Gliomas; Grade II – Ependymoma                    | 0.29 [ 0.21; 0.41]   |
| Pooled Totals                                                           |                             | 0.29 [ 0.21; 0.41]                                |                      |
| <i>Heterogeneity: I-squared=Na%<sup>s</sup>, Q=0, df=0, p=1</i>         |                             |                                                   |                      |
| <b>Gliomas; Grade III – Astrocytoma</b>                                 |                             |                                                   |                      |
| Ligant, 2000                                                            | Estonia                     | Gliomas; Grade III – Astrocytoma                  | 0.46 [ 0.37; 0.57]   |
| Dobec-Meic, 2006                                                        | Croatia                     | Gliomas; Grade III – Astrocytoma                  | 0.50 [ 0.21; 1.17]   |
| Wohrer, 2009                                                            | Austria                     | Gliomas; Grade III – Astrocytoma                  | 0.44 [ 0.33; 0.58]   |
| Pooled Totals                                                           |                             | 0.45 [ 0.38; 0.54]                                |                      |
| <i>Heterogeneity: I-squared=0%, Q=0.1, df=2, p=0.9464</i>               |                             |                                                   |                      |
| <b>Gliomas; Grade III – Not specified</b>                               |                             |                                                   |                      |
| Elia-Pasquet, 2004                                                      | France                      | Gliomas; Grade III – Not specified                | 0.66 [ 0.32; 1.39]   |
| Pooled Totals                                                           |                             | 0.66 [ 0.32; 1.39]                                |                      |
| <i>Heterogeneity: I-squared=Na%<sup>s</sup>, Q=0, df=0, p=1</i>         |                             |                                                   |                      |
| <b>Gliomas; Grade III – Oligoastrocytomas grade</b>                     |                             |                                                   |                      |
| Dobec-Meic, 2006                                                        | Croatia                     | Gliomas; Grade III – Oligoastrocytomas grade      | 0.20 [ 0.04; 1.10]   |
| Pooled Totals                                                           |                             | 0.20 [ 0.04; 1.10]                                |                      |
| <i>Heterogeneity: I-squared=Na%<sup>s</sup>, Q=0, df=0, p&lt;0.0001</i> |                             |                                                   |                      |
| <b>Gliomas; Grade III – Oligodendroglioma</b>                           |                             |                                                   |                      |
| Dobec-Meic, 2006                                                        | Croatia                     | Gliomas; Grade III – Oligodendroglioma            | 0.30 [ 0.09; 0.95]   |
| Pooled Totals                                                           |                             | 0.30 [ 0.09; 0.95]                                |                      |
| <i>Heterogeneity: I-squared=Na%<sup>s</sup>, Q=0, df=0, p&lt;0.0001</i> |                             |                                                   |                      |
| <b>Gliomas; Grade III and IV – Not specified</b>                        |                             |                                                   |                      |
| Kuratsu, 2001                                                           | Japan                       | Gliomas; Grade III and IV – Not specified         | 1.56 [ 1.06; 2.29]   |
| Pooled Totals                                                           |                             | 1.56 [ 1.06; 2.29]                                |                      |
| <i>Heterogeneity: I-squared=Na%<sup>s</sup>, Q=0, df=0, p&lt;0.0001</i> |                             |                                                   |                      |
| <b>Gliomas; Grade IV – Glioblastoma</b>                                 |                             |                                                   |                      |
| Ligant, 2000                                                            | Estonia                     | Gliomas; Grade IV – Glioblastoma                  | 1.95 [ 1.75; 2.17]   |
| Dobec-Meic, 2006                                                        | Croatia                     | Gliomas; Grade IV – Glioblastoma                  | 4.80 [ 3.71; 6.21]   |
| Wohrer, 2009                                                            | Austria                     | Gliomas; Grade IV – Glioblastoma                  | 3.40 [ 3.10; 3.73]   |
| Elia-Pasquet, 2004                                                      | France                      | Gliomas; Grade IV – Glioblastoma                  | 10.67 [ 8.87; 12.83] |
| Pooled Totals                                                           |                             | 4.27 [ 2.26; 8.09]                                |                      |
| <i>Heterogeneity: I-squared=98.8%, Q=257.1, df=3, p&lt;0.0001</i>       |                             |                                                   |                      |
| <b>Gliomas; Grade NOS – Astrocytoma</b>                                 |                             |                                                   |                      |
| Al Sheyyab, 2003                                                        | Jordan                      | Gliomas; Grade NOS – Astrocytoma                  | 1.06 [ 0.83; 1.36]   |
| Ligant, 2000                                                            | Estonia                     | Gliomas; Grade NOS – Astrocytoma                  | 0.76 [ 0.65; 0.89]   |
| Makino, 2010                                                            | Japan                       | Gliomas; Grade NOS – Astrocytoma                  | 1.32 [ 1.05; 1.66]   |
| Dobec-Meic, 2006                                                        | Croatia                     | Gliomas; Grade NOS – Astrocytoma                  | 0.30 [ 0.09; 0.95]   |
| Kuratsu, 2001                                                           | Japan                       | Gliomas; Grade NOS – Astrocytoma                  | 0.57 [ 0.29; 1.13]   |
| Wohrer, 2009                                                            | Austria                     | Gliomas; Grade NOS – Astrocytoma                  | 5.33 [ 4.94; 5.76]   |
| Pooled Totals                                                           |                             | 1.05 [ 0.40; 2.75]                                |                      |
| <i>Heterogeneity: I-squared=99.2%, Q=652.2, df=5, p&lt;0.0001</i>       |                             |                                                   |                      |
| <b>Gliomas; Grade NOS – Oligoastrocytoma</b>                            |                             |                                                   |                      |
| Wohrer, 2009                                                            | Austria                     | Gliomas; Grade NOS – Oligoastrocytoma             | 0.27 [ 0.19; 0.39]   |
| Pooled Totals                                                           |                             | 0.27 [ 0.19; 0.39]                                |                      |
| <i>Heterogeneity: I-squared=Na%<sup>s</sup>, Q=0, df=0, p=1</i>         |                             |                                                   |                      |
| <b>Gliomas; Grade NOS – Oligodendroglioma</b>                           |                             |                                                   |                      |
| Ligant, 2000                                                            | Estonia                     | Gliomas; Grade NOS – Oligodendroglioma            | 0.25 [ 0.18; 0.34]   |
| Dobec-Meic, 2006                                                        | Croatia                     | Gliomas; Grade NOS – Oligodendroglioma            | 0.20 [ 0.05; 0.75]   |
| Wohrer, 2009                                                            | Austria                     | Gliomas; Grade NOS – Oligodendroglioma            | 0.70 [ 0.56; 0.88]   |
| Pooled Totals                                                           |                             | 0.36 [ 0.15; 0.87]                                |                      |
| <i>Heterogeneity: I-squared=93.4%, Q=30.5, df=2, p&lt;0.0001</i>        |                             |                                                   |                      |
| <b>Hemangioblastomas; All</b>                                           |                             |                                                   |                      |
| Elia-Pasquet, 2004                                                      | France                      | Hemangioblastomas; All                            | 0.66 [ 0.32; 1.39]   |
| Pooled Totals                                                           |                             | 0.66 [ 0.32; 1.39]                                |                      |
| <i>Heterogeneity: I-squared=Na%<sup>s</sup>, Q=0, df=0, p=1</i>         |                             |                                                   |                      |
| <b>Medullo/PNETs; All</b>                                               |                             |                                                   |                      |
| Al Sheyyab, 2003                                                        | Jordan                      | Medullo/PNETs; All                                | 0.50 [ 0.35; 0.72]   |
| Pekmezovic, 2009                                                        | Serbia                      | Medullo/PNETs; All                                | 0.60 [ 0.41; 0.89]   |
| Wohrer, 2009                                                            | Austria                     | Medullo/PNETs; All                                | 0.25 [ 0.16; 0.38]   |
| Pooled Totals                                                           |                             | 0.42 [ 0.26; 0.70]                                |                      |
| <i>Heterogeneity: I-squared=79.7%, Q=9.9, df=2, p=0.0072</i>            |                             |                                                   |                      |
| <b>Medullo/PNETs; Medulloblastoma</b>                                   |                             |                                                   |                      |
| Alston, 2003                                                            | England                     | Medullo/PNETs; Medulloblastoma                    | 0.36 [ 0.25; 0.51]   |
| Kaatsch, 1995                                                           | Germany                     | Medullo/PNETs; Medulloblastoma                    | 0.50 [ 0.46; 0.54]   |
| Kuratsu, 2001                                                           | Japan                       | Medullo/PNETs; Medulloblastoma                    | 0.07 [ 0.04; 0.13]   |
| Lacour, 2010                                                            | France                      | Medullo/PNETs; Medulloblastoma                    | 0.56 [ 0.50; 0.62]   |
| Ligant, 2000                                                            | Estonia                     | Medullo/PNETs; Medulloblastoma                    | 0.26 [ 0.19; 0.35]   |
| Makino, 2010                                                            | Japan                       | Medullo/PNETs; Medulloblastoma                    | 0.37 [ 0.24; 0.57]   |
| Giordana, 1999                                                          | Italy                       | Medullo/PNETs; Medulloblastoma                    | 0.05 [ 0.03; 0.10]   |
| Lee, 2010                                                               | Korea                       | Medullo/PNETs; Medulloblastoma                    | 0.15 [ 0.12; 0.19]   |
| Pooled Totals                                                           |                             | 0.23 [ 0.16; 0.35]                                |                      |
| <i>Heterogeneity: I-squared=96.7%, Q=212.9, df=7, p&lt;0.0001</i>       |                             |                                                   |                      |
| <b>Medullo/PNETs; Medulloepithelioma</b>                                |                             |                                                   |                      |
| Lacour, 2010                                                            | France                      | Medullo/PNETs; Medulloepithelioma                 | 0.00 [ 0.00; 0.00]   |
| Pooled Totals                                                           |                             | 0.00 [ 0.00; 0.00]                                |                      |
| <i>Heterogeneity: I-squared=Na%<sup>s</sup>, Q=0, df=0, p=1</i>         |                             |                                                   |                      |
| <b>Medullo/PNETs; PNETs</b>                                             |                             |                                                   |                      |
| Kaatsch, 2001                                                           | Germany                     | Medullo/PNETs; PNETs                              | 0.70 [ 0.65; 0.75]   |
| Lacour, 2010                                                            | France                      | Medullo/PNETs; PNETs                              | 0.11 [ 0.09; 0.14]   |
| Peris-Bonet, 2006                                                       | Europe                      | Medullo/PNETs; PNETs                              | 6.50 [ 6.25; 6.76]   |
| Pooled Totals                                                           |                             | 0.80 [ 0.12; 5.39]                                |                      |
| <i>Heterogeneity: I-squared=99.9%, Q=3870.9, df=2, p&lt;0.0001</i>      |                             |                                                   |                      |
| <b>Meningioma; All</b>                                                  |                             |                                                   |                      |
| Ligant, 2000                                                            | Estonia                     | Meningioma; All                                   | 1.71 [ 1.53; 1.92]   |
| Makino, 2010                                                            | Japan                       | Meningioma; All                                   | 0.06 [ 0.02; 0.16]   |
| Davis, 2001                                                             | USA                         | Meningioma; All                                   | 3.70 [ 3.55; 3.86]   |
| Dobec-Meic, 2006                                                        | Croatia                     | Meningioma; All                                   | 3.10 [ 2.24; 4.28]   |
| Kuratsu, 2001                                                           | Japan                       | Meningioma; All                                   | 3.40 [ 2.64; 4.38]   |
| Pobereskin, 2000                                                        | England                     | Meningioma; All                                   | 3.99 [ 2.67; 5.96]   |
| Porter, 2010                                                            | USA                         | Meningioma; All                                   | 6.00 [ 5.85; 6.15]   |
| Wohrer, 2009                                                            | Austria                     | Meningioma; All                                   | 5.23 [ 4.85; 5.63]   |
| Christensen, 2003                                                       | Denmark                     | Meningioma; All                                   | 2.14 [ 2.04; 2.24]   |
| Pooled Totals                                                           |                             | 2.64 [ 1.85; 3.75]                                |                      |
| <i>Heterogeneity: I-squared=99.6%, Q=1874.5, df=8, p&lt;0.0001</i>      |                             |                                                   |                      |
| <b>Meningioma; Atypical</b>                                             |                             |                                                   |                      |
| Wohrer, 2009                                                            | Austria                     | Meningioma; Atypical                              | 0.58 [ 0.46; 0.73]   |
| Pooled Totals                                                           |                             | 0.58 [ 0.46; 0.73]                                |                      |
| <i>Heterogeneity: I-squared=Na%<sup>s</sup>, Q=0, df=0, p=1</i>         |                             |                                                   |                      |
| <b>Meningioma; Malignant</b>                                            |                             |                                                   |                      |
| Wohrer, 2009                                                            | Austria                     | Meningioma; Malignant                             | 0.26 [ 0.18; 0.37]   |
| Pooled Totals                                                           |                             | 0.26 [ 0.18; 0.37]                                |                      |
| <i>Heterogeneity: I-squared=Na%<sup>s</sup>, Q=0, df=0, p=1</i>         |                             |                                                   |                      |
| <b>Nerve sheath tumors; Cranial Nerve</b>                               |                             |                                                   |                      |
| Pobereskin, 2000                                                        | England                     | Nerve sheath tumors; Cranial Nerve                | 2.38 [ 1.38; 4.10]   |
| Wohrer, 2009                                                            | Austria                     | Nerve sheath tumors; Cranial Nerve                | 1.36 [ 1.17; 1.58]   |
| Pooled Totals                                                           |                             | 1.69 [ 0.99; 2.88]                                |                      |
| <i>Heterogeneity: I-squared=73.6%, Q=3.8, df=1, p=0.0516</i>            |                             |                                                   |                      |
| <b>Nerve sheath tumors; Schwannoma</b>                                  |                             |                                                   |                      |
| Ligant, 2000                                                            | Estonia                     | Nerve sheath tumors; Schwannoma                   | 0.35 [ 0.27; 0.45]   |
| Dobec-Meic, 2006                                                        | Croatia                     | Nerve sheath tumors; Schwannoma                   | 0.60 [ 0.30; 1.20]   |
| Kuratsu, 2001                                                           | Japan                       | Nerve sheath tumors; Schwannoma                   | 1.08 [ 0.68; 1.72]   |
| Wohrer, 2009                                                            | Austria                     | Nerve sheath tumors; Schwannoma                   | 1.24 [ 1.06; 1.46]   |
| Pooled Totals                                                           |                             | 0.73 [ 0.34; 1.65]                                |                      |
| <i>Heterogeneity: I-squared=95.7%, Q=69.4, df=3, p&lt;0.0001</i>        |                             |                                                   |                      |
| <b>Nerve sheath tumors; Schwannoma – vestibular</b>                     |                             |                                                   |                      |
| Frohlich, 1993                                                          | Canada                      | Nerve sheath tumors; Schwannoma – vestibular      | 1.27 [ 1.00; 1.61]   |
| Pooled Totals                                                           |                             | 1.27 [ 1.00; 1.61]                                |                      |
| <i>Heterogeneity: I-squared=Na%<sup>s</sup>, Q=0, df=0, p=1</i>         |                             |                                                   |                      |
| <b>Others; Haematopoetic system tumors</b>                              |                             |                                                   |                      |
| Wohrer, 2009                                                            | Austria                     | Others; Haematopoetic system tumors               | 0.57 [ 0.45; 0.72]   |
| Pooled Totals                                                           |                             | 0.57 [ 0.45; 0.72]                                |                      |
| <i>Heterogeneity: I-squared=Na%<sup>s</sup>, Q=0, df=0, p=1</i>         |                             |                                                   |                      |
| <b>Others; Mesenchymal, non meningoepithelial tumors</b>                |                             |                                                   |                      |
| Wohrer, 2009                                                            | Austria                     | Others; Mesenchymal, non meningoepithelial tumors | 0.08 [ 0.04; 0.16]   |
| Pooled Totals                                                           |                             | 0.08 [ 0.04; 0.16]                                |                      |
| <i>Heterogeneity: I-squared=Na%<sup>s</sup>, Q=0, df=0, p=1</i>         |                             |                                                   |                      |
| <b>Others; Neuroepithelial tumors</b>                                   |                             |                                                   |                      |
| Davis, 2001                                                             | USA                         | Others; Neuroepithelial tumors                    | 6.50 [ 6.26; 6.75]   |
| Dobec-Meic, 2006                                                        | Croatia                     | Others; Neuroepithelial tumors                    | 6.70 [ 5.47; 8.26]   |
| Pobereskin, 2000                                                        | England                     | Others; Neuroepithelial tumors                    | 9.83 [ 7.34; 13.12]  |
| Wohrer, 2009                                                            | Austria                     | Others; Neuroepithelial tumors                    | 7.26 [ 6.79; 7.76]   |
| Pooled Totals                                                           |                             | 7.09 [ 6.36; 7.91]                                |                      |
| <i>Heterogeneity: I-squared=79.6%, Q=14.7, df=3, p=0.0021</i>           |                             |                                                   |                      |
| <b>Others; Neuronal and mixed neuronal glial tumors</b>                 |                             |                                                   |                      |
| Wohrer, 2009                                                            | Austria                     | Others; Neuronal and mixed neuronal glial tumors  | 0.29 [ 0.20; 0.42]   |
| Pooled Totals                                                           |                             | 0.29 [ 0.20; 0.42]                                |                      |
| <i>Heterogeneity: I-squared=Na%<sup>s</sup>, Q=0, df=0, p=1</i>         |                             |                                                   |                      |
| <b>Pineal tumors; All</b>                                               |                             |                                                   |                      |
| Al Sheyyab, 2003                                                        | Jordan                      | Pineal tumors; All                                | 0.02 [ 0.00; 0.14]   |
| Kaatsch, 2001                                                           | Germany                     | Pineal tumors; All                                | 0.02 [ 0.00; 0.14]   |
| Pooled Totals                                                           |                             | 0.02 [ 0.00; 0.14]                                |                      |
| <i>Heterogeneity: I-squared=Na%<sup>s</sup>, Q=0, df=0, p=1</i>         |                             |                                                   |                      |
| <b>Pineal tumors; Parenchymal</b>                                       |                             |                                                   |                      |
| Lacour, 2010                                                            | France                      | Pineal tumors; Parenchymal                        | 0.02 [ 0.01; 0.04]   |
| Wohrer, 2009                                                            | Austria                     | Pineal tumors; Parenchymal                        | 0.07 [ 0.03; 0.16]   |
| Lee, 2010                                                               | Korea                       | Pineal tumors; Parenchymal                        | 0.01 [ 0.01; 0.03]   |
| Pooled Totals                                                           |                             | 0.03 [ 0.01; 0.06]                                |                      |
| <i>Heterogeneity: I-squared=79.7%, Q=9.8, df=2, p=0.0073</i>            |                             |                                                   |                      |
| <b>Sellar tumors; Adenoma – pituitary</b>                               |                             |                                                   |                      |
| Ligant, 2000                                                            | Estonia                     | Sellar tumors; Adenoma – pituitary                | 0.43 [ 0.34; 0.54]   |
| Makino, 2010                                                            | Japan                       | Sellar tumors; Adenoma – pituitary                | 0.13 [ 0.07; 0.26]   |
| Dobec-Meic, 2006                                                        | Croatia                     | Sellar tumors; Adenoma – pituitary                | 0.80 [ 0.41; 1.55]   |
| Kuratsu, 2001                                                           | Japan                       | Sellar tumors; Adenoma – pituitary                | 2.06 [ 1.50; 2.83]   |
| Wohrer, 2009                                                            | Austria                     | Sellar tumors; Adenoma – pituitary                | 1.63 [ 1.42; 1.88]   |
| Lee, 2010                                                               | Korea                       | Sellar tumors; Adenoma – pituitary                | 1.62 [ 1.51; 1.74]   |
| Pooled Totals                                                           |                             | 0.86 [ 0.53; 1.40]                                |                      |
| <i>Heterogeneity: I-squared=97.1%, Q=174.6, df=5, p&lt;0.0001</i>       |                             |                                                   |                      |
| <b>Sellar tumors; All</b>                                               |                             |                                                   |                      |
| Pobereskin, 2000                                                        | England                     | Sellar tumors; All                                | 3.99 [ 2.55; 6.23]   |
| Wohrer, 2009                                                            | Austria                     | Sellar tumors; All                                | 1.81 [ 1.59; 2.07]   |
| Lacour, 2010                                                            | France                      | Sellar tumors; All                                | 0.19 [ 0.15; 0.22]   |
| Lee, 2010                                                               | Korea                       | Sellar tumors; All                                | 1.85 [ 1.74; 1.98]   |
| Pooled Totals                                                           |                             | 1.24 [                                            |                      |
