# Supplementary material
Source: PubMed Central journal article supplement (PMC4483114)

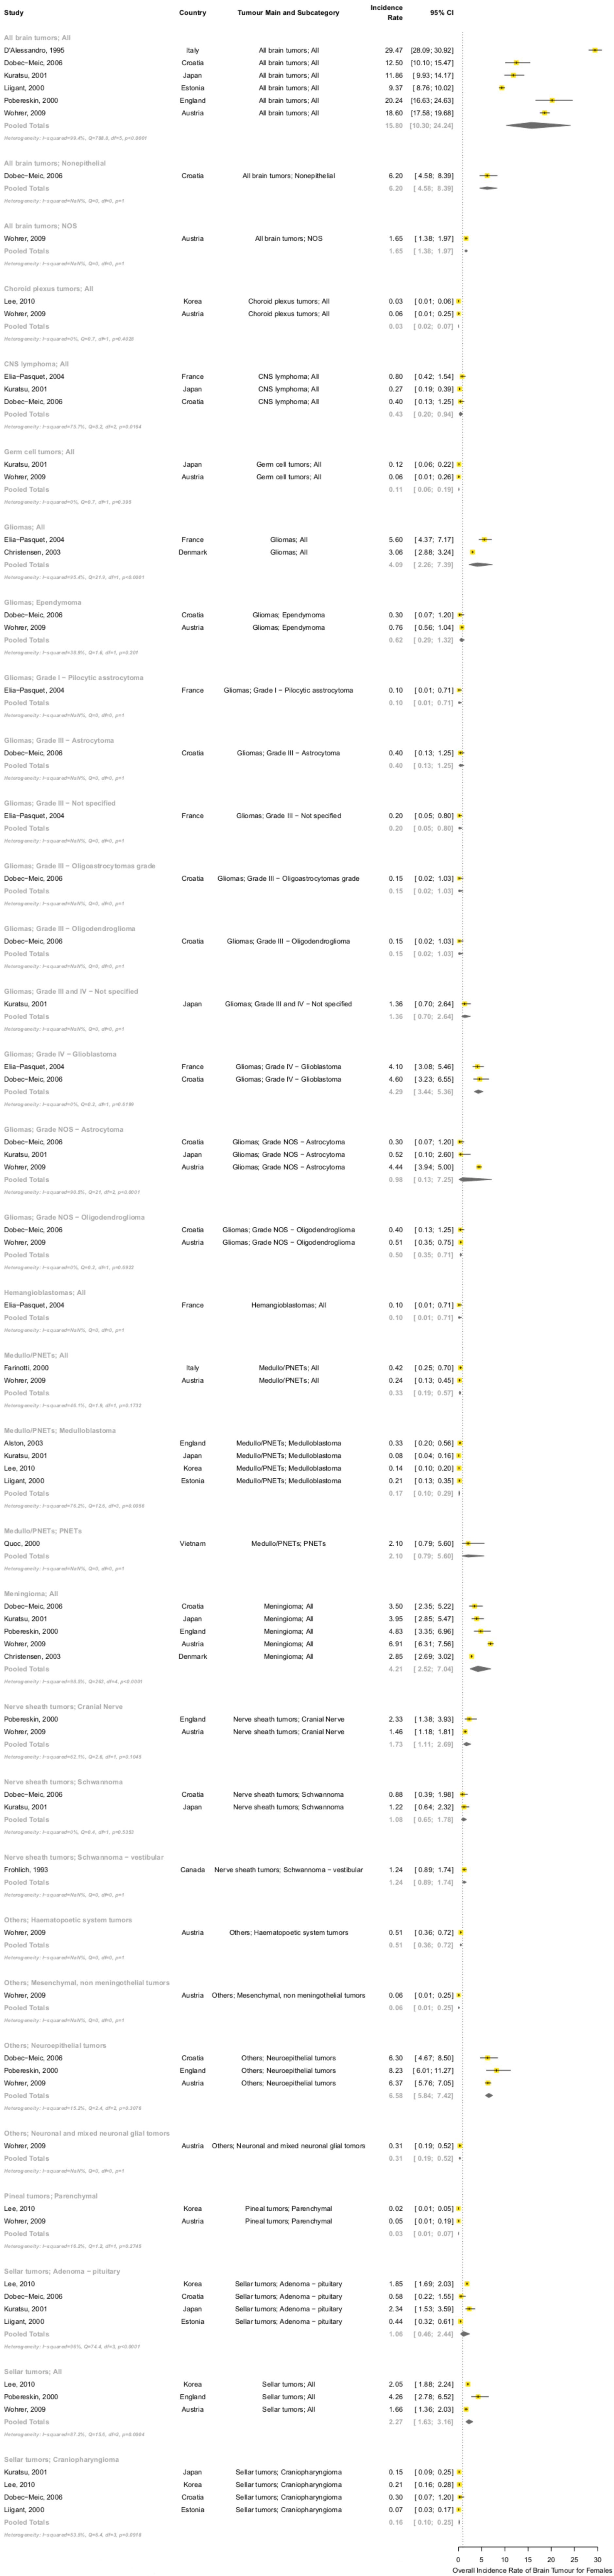

Supplement: supp_nou283_nou283supp_fig2.pdf [file supp_nou283_nou283supp_fig2.pdf]

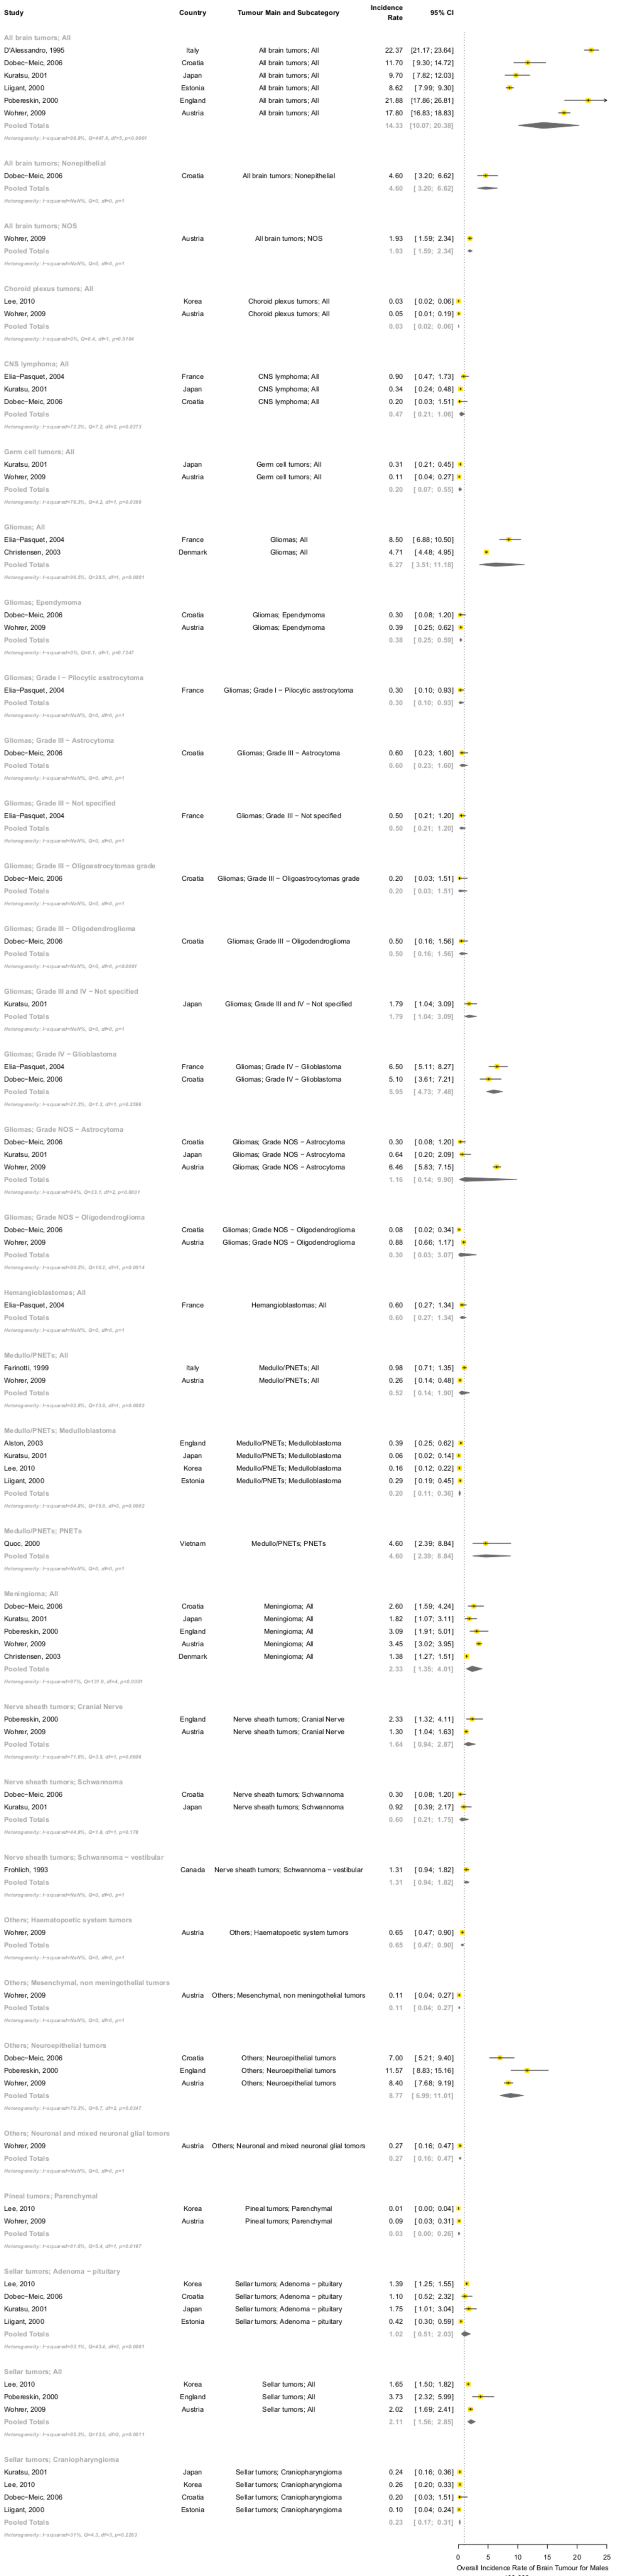

Overall Incidence Rate of Brain Tumour for Males per 100,000 person-years

Supplement: supp_nou283_nou283supp_fig3.pdf [file supp_nou283_nou283supp_fig3.pdf]
